1 **bHLH11 negatively regulates Fe homeostasis by its EAR motifs**  
2 **recruiting corepressors in Arabidopsis**

3

4 Yang Li<sup>a,b,1</sup>, Rihua Lei<sup>a,b,1</sup>, Mengna Pu<sup>a,b,c</sup>, Yuerong Cai<sup>a,b,c</sup>, Chengkai Lu<sup>a,b</sup>,  
5 Zhifang Li<sup>d</sup>, Gang Liang<sup>a,b,2</sup>

6

7 <sup>a</sup>CAS Key Laboratory of Tropical Plant Resources and Sustainable Use,  
8 Xishuangbanna Tropical Botanical Garden, Chinese Academy of Sciences,  
9 Kunming, Yunnan 650223, China

10 <sup>b</sup>Center of Economic Botany, Core Botanical Gardens, Chinese Academy of  
11 Sciences, Menglun, Mengla, Yunnan 666303, China

12 <sup>c</sup>University of Chinese Academy of Sciences, Beijing 100049, China

13 <sup>d</sup>State Key Laboratory of Cotton Biology, State Key Laboratory of Crop Stress  
14 Adaptation and Improvement, School of Life Sciences, Henan University, No.  
15 85 Minglun Street, Kaifeng, Henan 475001, China

16 <sup>1</sup>These authors contributed equally to this work

17 <sup>2</sup>Correspondence: [lianggang@xtbg.ac.cn](mailto:lianggang@xtbg.ac.cn)

18

19 **Running title:** bHLH11 acts an active repressor

20 **One-sentence summary:** bHLH11 interacts with and inhibits transcriptional  
21 activation ability of bHLH IVc TFs via its EAR motifs recruiting the  
22 TOPLESS/TOPLESS-RELATED corepressors to finetune Fe homeostasis in  
23 Arabidopsis.

24

25

26

27

28

29

30

31

32 **ABSTRACT**

33

34 Iron (Fe) homeostasis is essential for plant growth and development. Although  
35 tremendous progress has been made in understanding the maintenance of Fe  
36 homeostasis in plants, the underlying molecular mechanisms remain elusive.  
37 Recently, bHLH11 was reported to function as a negative regulator. However,  
38 the molecular mechanism by which bHLH11 regulates Fe homeostasis is  
39 unclear. Here, we generated two *bhlh11* loss-of-function mutants which  
40 displayed the enhanced sensitivity to excessive Fe. bHLH11 is located in the  
41 cytoplasm and nucleus due to lack of a nuclear location signal sequence, and  
42 its interaction partners, bHLH IVc transcription factors (TFs) (bHLH34,  
43 bHLH104, bHLH105 and bHLH115) facilitate its nuclear accumulation. bHLH11  
44 exerts its negative regulation function by recruiting the corepressors  
45 TOPLESS/TOPLESS-RELATED. Moreover, bHLH11 antagonizes the  
46 transactivity of bHLH IVc TFs towards bHLH Ib genes (*bHLH38*, *bHLH39*,  
47 *bHLH100* and *bHLH101*). This work indicates that bHLH11 is a crucial  
48 component of Fe homeostasis signaling network, playing a pivotal role in the  
49 fine-tuning of Fe homeostasis.

50

51

## 52 INTRODUCTION

53

54 Iron (Fe) is an indispensable microelement for plant growth and development.  
55 Plants acquire Fe from the soil, which has low concentrations of Fe available,  
56 especially in alkaline environments (Jeong and Guerinot, 2009). As about  
57 one-third of the world's cultivated land is calcareous (alkaline), iron deficiency  
58 is common for plants. Fe functions in many physiological processes, such as  
59 photosynthesis, respiration, hormone biosynthesis, and nitrogen fixation. Fe  
60 deficiency causes symptoms including delayed growth and leaf chlorosis and  
61 can affect the yield and nutritional quality of crops. Although Fe is required for  
62 plant growth and development, excess Fe can be toxic to plants because Fe  
63 can cause the production of reactive oxygen radicals that are harmful to plant  
64 cells (Quinet et al. 2012). Therefore, maintaining Fe homeostasis in plant cells  
65 is crucial for their normal growth and development.

66 Plants have evolved a set of molecular mechanisms for iron absorption,  
67 transport, distribution, and storage that ensure appropriate Fe concentrations  
68 in cells under low Fe availability. Dicotyledonous and non-gramineous  
69 monocotyledonous plants take up Fe using a reduction strategy (strategy I). In  
70 *Arabidopsis thaliana*, this strategy involves rhizosphere acidification, ferric iron  
71 reduction, and ferrous iron transport. H<sup>+</sup>-ATPases such as the P-type ATPase  
72 AHA2/AHA7 release protons into the soil, which improves the solubility of Fe in  
73 the soil (Santi and Schmidt, 2009; Kobayashi and Nishizawa, 2012). Then, the  
74 root surface Fe chelate reductase FERRIC REDUCTION OXIDASE2 (FRO2)  
75 catalyzes the reduction of Fe<sup>3+</sup> to Fe<sup>2+</sup> (Robinson et al. 1999). Transporters  
76 such as IRON-REGULATED TRANSPORTER1 (IRT1) transport Fe<sup>2+</sup> into  
77 roots (Henriques et al. 2002; Varotto et al. 2002; Vert et al. 2002). By contrast,  
78 gramineous plants employ a chelation strategy (strategy II) in which  
79 high-affinity Fe chelators of the mugineic acid family, also known as  
80 phytosiderophores, are secreted into the rhizosphere and facilitate the uptake  
81 of the Fe<sup>3+</sup>-phytosiderophore complex. Recent studies suggest that secretion

82 of Fe-chelating compounds is also important for the survival of  
83 non-gramineous plants such as Arabidopsis in alkaline soil (Rodríguez-Celm  
84 et al. 2013; Schmid et al. 2014; Fourcroy et al. 2014; Fourcroy et al. 2016;  
85 Siwinska et al. 2018; Tsai et al. 2018).

86 To maintain Fe homeostasis, plants must sense the environmental Fe  
87 concentration and fine-tune the expression of Fe uptake-associated genes  
88 accordingly. BRUTUS (BTS) interacts with the basic helix-loop-helix  
89 transcription factors bHLH105 and bHLH115 and promotes their degradation  
90 (Selote et al. 2015). bHLH105 and bHLH115 belong to the bHLH IVc group,  
91 which contains four members. The other two members are bHLH34 and  
92 bHLH104. These four members regulate the expression of *FER-LIKE*  
93 *IRON-DEFICIENCY-INDUCED TRANSCRIPTION FACTOR (FIT)*, bHLH Ib  
94 genes (*bHLH38*, *bHLH39*, *bHLH100*, and *bHLH101*) and *POPEYE (PYE)*  
95 (Zhang et al. 2015; Li et al. 2016; Liang et al. 2017). Recently, three studies  
96 characterized the functions of bHLH121 (Kim et al. 2019; Gao et al. 2020; Lei  
97 et al. 2020), and Lei et al. (2020) found that *bHLH121* is also directly regulated  
98 by bHLH IVc. FIT interacts with bHLH Ib TFs and they synergistically promote  
99 the expression of Fe-uptake associated genes *IRT1* and *FRO2* (Yuan et al.  
100 2008; Wang et al. 2013). PYE and bHLH11 are negative regulators of Fe  
101 homeostasis (Long et al. 2010; Tanabe et al. 2019). bHLH105/ILR3 also  
102 functions as a negative regulator when it interacts with PYE (Tissot et al. 2019).  
103 In contrast, bHLH121 is required for activation of numerous Fe deficiency  
104 responsive genes (Kim et al. 2019; Gao et al. 2020; Lei et al. 2020). Moreover,  
105 both bHLH 121 and PYE interact with bHLH IVc to regulate Fe homeostasis in  
106 Arabidopsis (Long et al. 2010; Selote et al. 2015; Kim et al. 2019; Tissot et al.  
107 2019; Gao et al. 2020; Lei et al. 2020). There is also a similar Fe deficiency  
108 response signaling network in rice (Ogo et al. 2007; Kobayashi 2013, 2019;  
109 Zhang et al. 2017, 2020; Wang et al. 2020; Li et al. 2020).

110 In the present study, we characterized the roles of bHLH11 in the  
111 maintenance of Fe homeostasis in Arabidopsis. bHLH11 recruits the

112 transcriptional corepressors TOPLESS/TOPLESS-RELATED (TPL/TPR) to  
113 exert its transcriptional repression function. bHLH11 is localized in both  
114 cytoplasm and nucleus and is exclusively in the nucleus when bHLH IVc TFs  
115 are abundant. bHLH11 also interacts with and inhibits bHLH IVc TFs.

116

117

## 118 **RESULTS**

119

### 120 **Loss-of-function of *bHLH11* impairs Fe homeostasis**

121 Recently, it was reported that the overexpression of *bHLH11* leads to the  
122 enhanced sensitivity to Fe deficiency (Tanabe et al. 2019). Here, we also  
123 confirmed this result (Figure S1). To further explore the functions of bHLH11,  
124 we attempted to isolate two T-DNA insertion mutants from the stocks  
125 (WiscDsLoxHs168\_11D and SAIL\_196\_A11). However, no T-DNA was  
126 identified within the *bHLH11* gene in the WiscDsLoxHs168\_11D; and *bHLH11*  
127 mRNA was slightly increased in the homozygous line of SAIL\_196\_A11 with a  
128 T-DNA in the promoter region (data not shown). Although the homozygous line  
129 of SAIL\_196\_A11 was lethal according to the recent study (Tanabe et al. 2019),  
130 we observed that they developed as well as the wild type. Thus, we employed  
131 the CRISPR-Cas9 system to edit *bHLH11*. Two single guide RNAs were  
132 designed to specifically target exons 4 and 3 of *bHLH11* and respectively  
133 integrated into the binary vector with a Cas9 (Liang et al. 2016) which were  
134 then used for transformation of the wild-type plants. We identified two  
135 homozygous mutants (*bhlh11-1* and *bhlh11-2*), the former containing a 1-bp  
136 insertion in exon 4 and the latter containing a 2-bp deletion in exon 3 (Figure  
137 S2), both of which caused a frameshift mutation in the bHLH domain. When  
138 grown on Fe0 or Fe100 media, no visible difference was observed between  
139 the *bhlh11* mutants and WT (Figure 1A). By contrast, when grown on Fe300  
140 media, the *bhlh11* mutants produced small shoots (Figure 1A, B). Fe content  
141 analysis suggested that the Fe concentration of *bhlh11* mutants was higher

142 than that of the WT (Figure 1C). These data suggest that the loss-of-function of  
143 *bHLH11* leads to the enhanced sensitivity to Fe excess.

144 To further investigate the effect of *bHLH11* on the Fe signaling network, we  
145 examined the expression of several Fe homeostasis associated genes (Table  
146 1). *IRT1* and *FRO2* were markedly lower in the *bHLH11-OX* plants than in the  
147 WT, whereas *BTS*, *PYE*, (*IRON MAN 1*) *IMA1*, bHLH 1b, were higher. By  
148 contrast, *BTS*, *PYE*, *IMA1*, bHLH 1b, and *FIT*, were expressed at higher levels  
149 in the *bhlh11* mutants than in the WT. These data suggest that loss-of-function  
150 of *bHLH11* impairs Fe homeostasis.

151

### 152 ***bHLH11* expression and subcellular localization**

153 To investigate the response of *bHLH11* to Fe status, RT-qPCR was used to  
154 determine the expression of *bHLH11* in response to Fe status, showing that  
155 *bHLH11* mRNA increased in the roots with an increase of Fe concentration in  
156 the growth media (Figure 2A), which is in consistence with the recent study  
157 (Tanabe et al. 2019). We next examined the response of *bHLH11* proteins to  
158 Fe status. One-week-old *bHLH11* overexpression plants grown on Fe100  
159 media were transferred to Fe0 or Fe300 media, and root samples were  
160 harvested after 1, 2, and 3 days. Immunoblot analysis showed that *bHLH11*  
161 increased with an increase in Fe concentration and decreased with a decrease  
162 in Fe concentration (Figure 2B).

163 Several Fe-homeostasis associated bHLH TFs were found outside the  
164 nucleus (Gratz et al. 2019; Trofimov et al. 2019; Lei et al. 2020; Wang et al.  
165 2020; Liang et al. 2020). To determine the subcellular localization of *bHLH11*,  
166 we generated the 35S:*bHLH11*-mCherry construct, in which the mCherry tag  
167 was fused in frame with the C terminus of *bHLH11*. When this construct was  
168 transiently expressed in tobacco leaves, mCherry was mainly observed in the  
169 cytoplasm and nucleus, which is very similar to that of free mCherry (Figure  
170 2C). The cytoplasmic localization of *bHLH11* was unexpected because  
171 transcription factors are known to function in the nucleus. Thus, we examined

172 whether bHLH11 can be retained in the cytoplasm due to a lack of a nuclear  
173 localization signal (NLS). NLS prediction was conducted by cNLS Mapper with  
174 a cutoff score = 4 (Kosugi et al. 2009;  
175 [http://nls-mapper.iab.keio.ac.jp/cgi-bin/NLS\\_Mapper\\_y.cgi](http://nls-mapper.iab.keio.ac.jp/cgi-bin/NLS_Mapper_y.cgi)). No NLS was  
176 found in bHLH11 (Figure S3). When bHLH11 was fused with NLS-mCherry,  
177 which contains an NLS from the SV40 virus, bHLH11-NLS-mCherry was  
178 exclusively localized in the nucleus (Figure 2C). These data suggest that lack  
179 of an NLS causes the cytoplasmic localization of bHLH11.

180

### 181 **bHLH11 interacts with bHLH IVc TFs in the nucleus**

182 Considering that TFs usually functions in the nucleus and an NLS allowed  
183 bHLH11 to remain in the nucleus, we hypothesized that bHLH11 might be  
184 recruited to the nucleus by its nuclear-localized interaction partners. Recent  
185 studies revealed that bHLH121, the closest homolog of bHLH11, interacts with  
186 bHLH IVc TFs (Kim et al. 2019; Gao et al. 2020; Lei et al. 2020). Therefore, we  
187 employed the yeast two-hybrid system to test whether bHLH11 interacts with  
188 bHLH IVc TFs. The bHLH11 protein was fused with the GAL4 DNA binding  
189 domain in the pGBKT7 vector as the bait (BD-bHLH11). bHLH IVc TFs were  
190 cloned to the pGADT7 vector as the preys. As expected, bHLH11 interacts with  
191 all four bHLH IVc TFs in yeast (Figure 3A).

192 To confirm that bHLH IVc TFs interact with bHLH11 in plant cells, we  
193 employed the tripartite split-GFP system (Liu et al. 2018). The GFP10  
194 fragment was fused with bHLH IVc proteins in their N-terminus (GFP10-bHLH  
195 IVc) and the GFP11 was fused with bHLH11 in the C-terminus  
196 (bHLH11-GFP11). When GFP10-bHLH IVc and bHLH11-GFP11 were  
197 transiently co-expressed with GFP1-9 in tobacco leaves, the GFP signal was  
198 visible in the nucleus of transformed cells (Figure 3B). By contrast, the other  
199 combinations did not result in a GFP signal in the cells (Figure 3B).

200 We next performed a coimmunoprecipitation (Co-IP) assay to confirm the  
201 interactions between bHLH IVc TFs and bHLH11 (Figure 3C). MYC tag-fused

202 bHLH IVc TFs and HA tag-fused bHLH11 were transiently co-expressed in  
203 tobacco leaves. The total proteins were incubated with MYC antibody and  
204 A/G-agarose beads and then separated on SDS-PAGE for immunoblotting  
205 with HA antibody. Consistent with the results from the yeast two-hybrid and  
206 tripartite split-GFP assays, bHLH IVc and bHLH11 were present in the same  
207 protein complex. These data suggest that bHLH IVc TFs physically interact  
208 with bHLH11.

209

### 210 **bHLH IVc TFs affect the subcellular localization of bHLH11**

211 Having confirmed that bHLH11 interacts with bHLH IVc TFs in the nucleus, we  
212 wondered whether the bHLH IVc TFs have an impact on the subcellular  
213 localization of bHLH11. When any one of these four GFP tagged proteins was  
214 respectively co-expressed with bHLH11-mCherry, bHLH11-mCherry  
215 accumulated exclusively in the nucleus (Figure 4A). By contrast, co-expression  
216 of the free GFP did not affect the subcellular localization of bHLH11-mCherry  
217 (Figure 4A).

218 To further confirm the distribution of bHLH11 in the cytoplasm and nucleus,  
219 we used immunoblot to measure the expression of the bHLH11 protein. As  
220 shown in Figure 4B, bHLH11 protein was detected both in the nucleus and  
221 cytoplasm, and both its nuclear and cytoplasmic counterparts were responsive  
222 to Fe status.

223

### 224 **bHLH11 antagonizes the transactivity of bHLH IVc TFs**

225 The bHLH Ib genes are activated directly by the bHLH IVc TFs (Zhang et al.  
226 2015; Li et al. 2016; Liang et al. 2017). Our expression analyses also  
227 suggested that the bHLH Ib genes were upregulated in the *bhlh11* mutants,  
228 implying that bHLH11 is a negative regulator of bHLH Ib genes. Because  
229 bHLH11 interacts with the bHLH IVc TFs, we proposed that bHLH11 could  
230 antagonize the functions of the bHLH IVc TFs. To confirm this hypothesis,  
231 transient expression assays were conducted in Arabidopsis protoplasts (Figure



232 5A). The reporter construct *ProbHLH38:LUC*, in which the LUC reporter was  
233 fused with the promoter of *bHLH38*, and different effectors in which the 35S  
234 promoter was used to drive GFP, bHLH11 or bHLH IVc, were used in the  
235 transient assays. Compared to GFP, bHLH IVc TFs activated the expression of  
236 *ProbHLH38:LUC*, whereas bHLH11 had no significant effect. When bHLH11  
237 and bHLH IVc were co-expressed, the the LUC/REN ratio declined significantly.  
238 These data suggest that bHLH11 inhibits the transactivity of bHLH IVc TFs  
239 towards *bHLH38*.

240 To further investigate whether bHLH11 inhibits the functions of bHLH IVc  
241 TFs by direct protein–protein interaction, we employed the *pGAL4* promoter. In  
242 the reporter construct, GFP fused with an NLS sequence was driven by *pGAL4*  
243 containing the minimal CaMV 35S promoter with five repeats of the GAL4  
244 binding motif (Figure 5B). In the effectors, the DNA binding domain (BD) of  
245 GAL4 was fused in frame with either bHLH104 or bHLH105 and driven by the  
246 35S promoter. Consistent with the fact that bHLH IVc TFs are transcriptional  
247 activators, the chimeric BD-bHLH104 or bHLH105 activated the expression of  
248 *GFP*. When bHLH11 was co-expressed with BD-bHLH104 or BD-bHLH105,  
249 the expression of *GFP* was significantly repressed. These data suggest that  
250 bHLH11 antagonizes the transcriptional activation ability of bHLH IVc TFs  
251 through direct protein interaction.

252 Although bHLH11 antagonizes the functions of bHLH IVc TFs, its  
253 overexpression caused the increase expression of bHLH Ib genes. We  
254 reasoned that the disrupted Fe homeostasis and severe growth inhibition may  
255 account for the upregulation expression of bHLH Ib genes in *bHLH11-OX*  
256 plants. To confirm our hypothesis, we generated transgenic plants containing a  
257 *pER8-bHLH11* construct, in which the *HA-bHLH11* fusion gene was under the  
258 control of an inducible promoter, activated by estradiol. Under control  
259 conditions, the *bHLH11* transcript level was similar between the WT and  
260 *pER8-bHLH11*. After treatment with estradiol, the *bHLH11* gene was  
261 overexpressed in the *pER8-bHLH11* plants with no obvious change in the WT

262 (Figure S4A). As expected, the *pER8-bHLH11* plants displayed enhanced  
263 sensitivity to Fe deficiency when grown on Fe<sub>0</sub> + estradiol media (Figure S4B).  
264 To examine the expression of Fe deficiency-responsive genes, plants grown  
265 on Fe<sub>100</sub> media were shifted to Fe<sub>0</sub> media and Fe<sub>0</sub> + estradiol media for 3  
266 days. We found that the expression of bHLH Ib genes was downregulated in  
267 the *pER8-bHLH11* plants after treatment with estradiol (Figure 5C).

268 Taken together, our data suggest that bHLH11 antagonizes the  
269 transcriptional activation ability of bHLH IVc TFs.

270

### 271 **bHLH11 functions as a transcriptional repressor by recruiting** 272 **TOPLESS/TOPLESS-RELATED corepressors**

273 Considering that bHLH11 negatively regulated the expression of Fe  
274 deficiency-responsive genes, we proposed that bHLH11 is a transcriptional  
275 repressor. To investigate how bHLH11 represses transcription, we analyzed its  
276 protein sequence and found two typical ethylene-responsive element binding  
277 factor-associated amphiphilic repression (EAR) motifs (LxLxL) in the  
278 C-terminal region of bHLH11 (Figure 6A; ). The EAR motif is a characteristic of  
279 proteins interacting with the TPL/TPRs which function as transcription  
280 corepressors (Szemenyei et al. 2008; Pauwels et al. 2010; Causier et al. 2012).  
281 Thus, we determined whether bHLH11 interacts with TPL/TPRs. Yeast  
282 two-hybrid assays indicated that bHLH11 interacts with TPL/TPRs (Figure 6B).  
283 To further investigate whether the EAR motifs are required for the interaction,  
284 the various EAR-mutated versions, bHLH11m1, bHLH11m2, and bHLH11dm,  
285 were tested for the interaction with TPL/TPRs. As shown in Figure 6B, the  
286 interaction between bHLH11 and TPL/TPRs was dependent on the EAR motifs,  
287 as mutation of both EAR motifs abolished the interaction between bHLH11 and  
288 TPL/TPRs.

289 To investigate whether the EAR motifs are required for the repressor  
290 function of bHLH11, we conducted reporter–effector transient expression  
291 assays in which bHLH105 was used as an effector to activate

292 *ProbHLH38-LUC*. We compared the effects of GFP, bHLH11, bHLH11dm, and  
293 bHLH11dm-VP16 (VP16, an established activation domain) on bHLH105  
294 (Figure 6C). Compared to the significant repression effect of bHLH11 on  
295 bHLH105, bHLH11dm had no significant effect, whereas bHLH11dm-VP16  
296 enhanced the transactivation function of bHLH105 (Figure 6D). These data  
297 suggest that bHLH11 functions as a transcriptional repressor and that this  
298 function is dependent on its EAR motifs.

299 To assess the consequences of disrupting the repressor functions of  
300 bHLH11 *in vivo*, we generated *bHLH11dm-VP16* transgenic plants. We  
301 hypothesized that *bHLH11dm-VP16* overexpression would not only be able to  
302 inhibit the functions of bHLH11 by competing with the endogenous bHLH11,  
303 but might also activate the target genes of bHLH11. Indeed, *bHLH11dm-VP16*  
304 plants showed enhanced tolerance to Fe deficiency compared to *bHLH11-OX*  
305 plants (Figure 6E). Expression analysis suggested that overexpression of  
306 *bHLH11dm-VP16* promotes the expression of *IRT1* and *FRO2* (Figure S5).  
307 Therefore, the EAR motifs are needed for the repression function of bHLH11.

308

## 309 DISCUSSION

310

311 Plants sense Fe-deficient environments and activate a signal transduction  
312 cascade that ultimately results in the transcriptional regulation of downstream  
313 effector genes of the Fe uptake system. The expression of Fe  
314 homeostasis-associated genes is tightly regulated by Fe availability, including  
315 environmental Fe availability and local Fe availability in developing tissues and  
316 organs. However, this mechanism is not an on-off process but rather a  
317 fine-tuned one, with multiple layers of transcription regulations. Considerable  
318 progress has been made in deciphering the signal transduction pathways that  
319 maintain Fe homeostasis, leading to the identification of many signaling  
320 components. Here, we show that bHLH11 acts an active repressor by  
321 recruiting TPL/TPRs. bHLH11 contributes to Fe homeostasis through a

322 sophisticated mechanism that involves physical interaction with bHLH IVc TFs,  
323 which down-regulates their transcription activation capacity.

324 We demonstrated that bHLH11 negatively regulates Fe uptake at the  
325 molecular and physiological level. The *bHLH11-OX* plants had reduced Fe  
326 concentration whereas its mutants had elevated Fe concentration (Figure 1C;  
327 Figure S1D), which is positively correlated with the expression *IRT1* and *FRO2*.  
328 It is well known that FIT interacts with bHLH Ib TFs to control the expression of  
329 *IRT1* and *FRO2*. Although bHLH Ib genes were upregulated and *FIT* was not  
330 affected in the *bHLH11-OX* plants, the expression of *IRT1* and *FRO2* was  
331 extremely inhibited (Table 1). Recently, Tanabe et al. (2019) reported that  
332 *bHLH11* overexpression inhibits the expression of both *FIT* and *IRT1/FRO2*,  
333 and concluded that bHLH11 negatively regulates *IRT1* and *FRO2* in a  
334 FIT-dependent manner (Tanabe et al. 2019). However, we did not find the  
335 significant response of *FIT* to *bHLH11* overexpression. Therefore, it is  
336 plausible that bHLH11 directly represses the expression of *IRT1* and *FRO2*.  
337 Recently, Gao et al. (2020) found that bHLH11 interacts with itself in yeast,  
338 implying that bHLH11 may function as a homodimer to regulate its target  
339 genes.

340 Two types of transcriptional repressors exist: active and passive (Krogan  
341 and Long, 2009). Generally, active repressors repress transcription by  
342 recruiting transcriptional repression components, whereas passive repressors  
343 indirectly influence transcription by competitively interfering with activators.  
344 The TPL/TPRs are a class of corepressors (Causier et al. 2012). Our work  
345 confirmed that bHLH11 interacts with TPL/TPRs and negatively regulates gene  
346 expression, suggesting that bHLH11 functions as an active repressor. The  
347 observation that the EAR motif (LxLxL) is conserved in bHLH11 homologs  
348 across different plant species, such as maize (*Zea mays*), rice, and *Brassica*  
349 *rapa* (Figure S6), implies that different plant species employ a conserved  
350 repression strategy to fine-tune Fe homeostasis.

351 The antagonistic regulation between positive and negative transcription

352 factors is prevalent in plants. For example, the transcription factors MYC2,  
353 MYC3, and MYC4 as well as bHLH3, bHLH13, bHLH14, and bHLH17  
354 antagonistically regulate jasmonic acid (JA) signaling (Fernandez-Calvo et al.  
355 2011; Song et al. 2013). In Fe homeostasis signaling, the bHLH IVa TFs  
356 (bHLH18, bHLH19, bHLH20, and bHLH25) antagonize the activity of the bHLH  
357 Ib TFs in regulating FIT protein stability under Fe deficiency (Cui et al. 2018).  
358 Here, we show the antagonistic regulation between bHLH11 and bHLH IVc  
359 TFs. In addition to transcriptional regulation, the protein degradation is another  
360 type of regulation in Fe homeostasis signaling. As reported previously,  
361 bHLH105 and bHLH115 are degraded by BTS via the 26S proteasome  
362 pathway (Selote et al. 2015). We found that bHLH11 protein was degraded  
363 under Fe deficient conditions (Figure 2B), which may benefit plants by  
364 alleviating the repression of bHLH11 to Fe uptake associated genes. These  
365 coordinated regulations of transcription and post-transcription may help plants  
366 adapt to their various Fe-nutrition habitats.

367 bHLH11 has no canonical NLS sequence (Figure S3). We showed that  
368 bHLH11 exists in the nucleus and cytoplasm and it accumulates in the nucleus  
369 with the assistance of its nuclear partners bHLH IVc TFs (Figure 4A). This  
370 transcription factor-dependent nuclear localization of bHLH11 might contribute  
371 to the maintenance of Fe homeostasis. bHLH11 inhibits the activation ability of  
372 bHLH IVc TFs and restricts the expression of Fe uptake-associated genes.  
373 The repressor function of bHLH11 may help plants avoid Fe toxicity and adapt  
374 to environments with an Fe excess by reducing the rate of Fe uptake. This  
375 putative protein shuttling strategy enables plants to respond quickly to Fe  
376 fluctuation.

377 Transcriptional activation of Fe deficiency-responsive genes occurs  
378 downstream of the bHLH IVc TFs. However, this mechanism may not be an  
379 on-off process. We show that bHLH11 contributes to Fe homeostasis via a  
380 sophisticated mechanism. As a negative transcription factor, bHLH11 exerts its  
381 repressor function by its EAR motifs recruiting the TPL/TPRs (Figure 6B). On

382 the other hand, bHLH11 physically interacts with and inhibits bHLH IVc TFs  
383 (Figure 5A, B). It is noteworthy the bHLH Ib genes were upregulated in both  
384 *bhlh11* mutants and *bHLH11-OX* plants. We hypothesize that a feedback  
385 regulation loop exists in the *bHLH11-OX* plants in which the Fe deficiency  
386 status caused by *bHLH11* overexpression promotes the upregulation of bHLH  
387 Ib genes. Similar feedback regulations are universal in Fe homeostasis. For  
388 example, loss-of-function mutations in the Fe transport-associated genes *IRT1*,  
389 *FRD3*, or *OPT3* lead to disruption of Fe homeostasis and cause the  
390 upregulation of bHLH Ib genes in Arabidopsis (Wang et al. 2007). Therefore, it  
391 is likely that the downregulation of *IRT1* and the low Fe status in the  
392 *bHLH11-OX* caused the upregulation of bHLH Ib genes by a feedback  
393 regulation. In support of this hypothesis, the expression levels of bHLH Ib  
394 genes were downregulated in the *pER8-bHLH11* plants after transient  
395 treatment with estradiol (Figure 5C), which ruled out the secondary effect  
396 caused by constitutive *bHLH11* overexpression.

397 Therefore, the expression levels of bHLH Ib genes are balanced by both  
398 bHLH IVc TFs and bHLH11. This study expands our knowledge of the Fe  
399 homeostasis transcription network mediated by bHLH Ib and IVc proteins.  
400 Based on our findings, we propose a putative working model for bHLH11  
401 (Figure 7). bHLH11 transcript and protein abundance decrease with a  
402 decrease in the environmental Fe concentration. bHLH11 functions as an  
403 active repressor by recruiting TPL/TPR corepressors. bHLH11 interacts with  
404 and inhibits the transcriptional activation ability of bHLH IVc TFs. When Fe is  
405 sufficient or excessive, *bHLH11* transcription is activated and bHLH11 protein  
406 accumulates. Some of bHLH11 proteins are recruited by bHLH IVc TFs into the  
407 nucleus, where bHLH11 represses the transcription of Fe  
408 deficiency-responsive genes by interacting with TPL/TPR corepressors. This  
409 enables roots to control Fe uptake and avoid Fe toxicity. Under Fe-deficient  
410 conditions, *bHLH11* transcription slows down and bHLH11 protein degradation  
411 accelerates, which relieves the repression by bHLH11 to Fe

412 deficiency-responsive genes and facilitates Fe uptake. Our study provides  
413 experimental support for the existence of an elaborate system that allows  
414 plants to respond dynamically to Fe status. This mechanism is based on an  
415 equilibrium between the activation of Fe uptake-associated genes by bHLH  
416 IVc and their repression by bHLH11. Disruption of this equilibrium by  
417 misexpression of *bHLH11* disturbs Fe homeostasis. Therefore, bHLH11 is a  
418 key component of the Fe homeostasis signaling pathway.

419

420

## 421 **MATERIALS AND METHODS**

422

### 423 **Plant Materials and Growth Conditions**

424 The *Arabidopsis thaliana* ecotype Columbia-0 was used as the wild type in this  
425 study. Plants were grown in long photoperiods (16-hour light/8-hour dark) or  
426 short photoperiods (10-hour light/14-hour dark) at 22°C. Surface sterilized  
427 seeds were stratified at 4°C for 2 d before being planted on media. Half  
428 Murashige and Skoog (MS) media with 1% sucrose, 0.8% agar A and the  
429 indicated FeEDTA concentration were used. Fe0 (0 µM Fe), Fe50 (50 µM Fe),  
430 Fe100 (100 µM Fe) and Fe300 (300 µM Fe).

431

### 432 **Generation of CRISPR/Cas9-edited *bHLH11***

433 For CRISPR/Cas9-mediated editing of *bHLH11*, two target sites were  
434 designed by CRISPR-GE (Xie et al. 2017) to target the third and fourth exon of  
435 bHLH11, which were driven by the AtU3b promoter and respectively cloned  
436 into the pMH-SA binary vector carrying the Cas9 (Liang et al. 2016). The wild  
437 type plants were transformed and positive transgenic plants were selected on  
438 half-strength MS medium containing 20 µg/mL hygromycin. The positive  
439 transformants were sequenced and the homozygous mutants without  
440 hygromycin resistance were selected for further analysis.

441



## 442 **Generation of transgenic Plants**

443 HA-tag or VP16 domain were fused in frame with the full-length coding  
444 sequence of *bHLH11* to generate *35S:HA-bHLH11* and *35S:bHLH11dm-VP16*  
445 in the pOCA30 binary vector. HA-tagged bHLH11 was cloned into pER8 vector  
446 (Zuo et al. 2001). These constructs were introduced into Arabidopsis plants  
447 using the agrobacterium-mediated floral dip method.

448

## 449 **Yeast-two-hybrid assays**

450 Full-length bHLH11 was cloned into pGBKT7 as a bait to screen an  
451 iron-depleted cDNA library. The full-length of bHLH IVc in the pGADT7 was  
452 described previously (Li et al. 2016). Growth was determined as described in  
453 the Yeast Two-Hybrid System User Manual (Clontech).

454

## 455 **Subcellular localization**

456 For the construction of *35S:bHLH11-mCherry*, mCherry-tag was fused with  
457 bHLH11. *35S:bHLH34-GFP*, *35S:bHLH104-GFP*, *35S:bHLH105-GFP*,  
458 *35S:bHLH115-GFP*, and *35S:GFP* were described previously (Lei et al. 2020).  
459 *35S:bHLH11-mCherry* was co-expressed with various GFP-containing vectors  
460 in tobacco cells. Epidermal cells were recorded on an OLYMPUS confocal  
461 microscope. Excitation laser wave lengths of 488 nm and 563 nm were used  
462 for imaging GFP and mCherry signals, respectively.

463

## 464 **Fluorescence complementation Assays**

465 The tripartite split-GFP fluorescence complementation assay was described as  
466 previously (Liu et al. 2018; Lei et al. 2020). bHLH11 was fused with a  
467 C-terminal GFP11 tag. The bHLH IVc genes were fused with an N-terminal  
468 GFP10 tag. All vectors were introduced into *A. tumefaciens* (strain EHA105)  
469 and the various combinations of Agrobacterial cells were infiltrated into leaves  
470 of *Nicotiana benthamiana* by an infiltration buffer (0.2 mM acetosyringone, 10  
471 mM MgCl<sub>2</sub>, and 10 mM MES, PH 5.6). Gene expression was induced 1 day



472 after agroinfiltration by injecting 20  $\mu$ M  $\beta$ -estradiol in the abaxial side of the  
473 leaves. Epidermal cells were recorded on a Carl Zeiss Microscopy.

474

#### 475 **Co-immunoprecipitation Assay**

476 HA-bHLH11 and MYC-bHLH IVc or MYC-GFP were transiently expressed in  
477 the *Nicotiana benthamiana* leaves and the leaves were infiltrated with MG132  
478 12 hours before harvesting. 2 g leaf samples were used for protein extraction  
479 in 2 ml IP buffer (50 mM Tris-HCl, pH 7.4, 150 mM NaCl, 1 mM MgCl<sub>2</sub>, 20%  
480 glycerol, 0.2% NP-40, 1 X protease inhibitor cocktail and 1 X phosphatase  
481 inhibitor cocktail from Roche). Lysates were clarified by centrifugation at 20,  
482 000 g for 15 min at 4 °C and were immunoprecipitated using MYC antibody. IP  
483 proteins were analyzed by immunoblot using anti-HA and anti-MYC antibody  
484 respectively (Affinity Biosciences).

485

#### 486 **Gene Expression Analysis**

487 Total root RNA was extracted by the use of the Trizol reagent (Invitrogen). For  
488 the reverse transcription reaction, 1  $\mu$ g total RNA was used for cDNA synthesis  
489 by oligo(dT)18 primer according to the manufacturer's protocol (Takara). The  
490 resulting cDNA was subjected to relative quantitative PCR using the ChamQ™  
491 SYBR qPCR Master Mix (Vazyme Biotech Co.,Ltd) on a Roche LightCycler  
492 480 real-time PCR machine, according to the manufacturer's instructions. For  
493 gene expression analysis in Arabidopsis plants, *ACT2* was used as an internal  
494 control and gene copy number was normalized to that of *ACT2*. For gene  
495 expression analysis in tobacco transient expression assays, *NPTII* was used  
496 as an internal control and gene copy number was normalized to that of *NPTII*.  
497 For the quantification of each gene, three biological replicates were used. The  
498 quantitative reverse transcription-PCR primers were listed in Table S1.

499

#### 500 **Fe Concentration Measurement**

501 To determine Fe concentration, rosette leaves from three-week-old seedlings

502 grown in soil were harvested and dried at 65 °C for 3 days. For each sample,  
503 about 100 mg dry weight was wet-ashed with 1.5 ml of 13.4 M HNO<sub>3</sub> and 1.5  
504 ml of 8.8 M H<sub>2</sub>O<sub>2</sub> for 20min at 220°C. Metal concentration was measured using  
505 Inductively Coupled Plasma Mass Spectrometry (ICP-MS). Three biological  
506 replicates were used for Fe concentration analysis.

507

### 508 **Transient expression assays in Arabidopsis protoplasts**

509 Arabidopsis mesophyll protoplasts preparation and subsequent transfection  
510 were performed as described previously (Wu et al. 2009). The promoter  
511 sequence of *bHLH38* was amplified from genomic DNA and cloned into  
512 pGreenII 0800-LUC vector. The coding sequences of GFP and various kinds of  
513 bHLHs (bHLH34, bHLH104, bHLH105, bHLH115, bHLH11, bHLH11dm and  
514 bHLH11dm-VP16) were respectively cloned into the pGreenII 62-SK vector  
515 under control of 35S promoter. For the reporter and effectors, 10 µg plasmid  
516 for each construct was used. After protoplasts preparation and subsequent  
517 transfection, firefly luciferase (LUC) and renillia luciferase (REN) activities  
518 were measured using the Dual-Luciferase Reporter Assay System (Promega)  
519 following the manufacturer's instructions. Relative (LUC) activity was  
520 calculated by normalizing against the REN activity.

521

### 522 **Transient expression assays in Tobacco**

523 *Agrobacterium tumefaciens* strains EHA105 was used in the transient  
524 expression experiments in tobacco. *pGAL4* promoter and BD domain were  
525 described previously (Li et al. 2016). *pGAL4* promoter was fused with  
526 NLS-GFP and cloned into the pOCA28 binary vector. 35S:BD,  
527 35S:BD-bHLH104, 35S:BD-bHLH105 and 35S:HA-bHLH11 were constructed  
528 in the pOCA30 binary vector. For co-infiltration, different agrobacterium strains  
529 carrying different constructs were mixed prior to infiltration. Leaf infiltration was  
530 conducted in 3-week-old *N. benthamiana*. *NPTII* gene in the pOCA28 vector  
531 was used as the internal control. *GFP* transcript abundance was normalized to

532 that of *NPTII*.

533

### 534 **Immunoblotting**

535 For total protein extraction, roots were ground to a fine powder in liquid  
536 nitrogen and then resuspended and extracted in RIPA buffer (50 mM Tris, 150  
537 mM NaCl, 1% NP-40, 0.5% Sodium deoxycholate, 0.1% SDS, 1 mM PMSF, 1 x  
538 protease inhibitor cocktail [pH 8.0]). Isolation of cytoplasmic and nuclear  
539 proteins was performed as described previously (Li et al. 2018). Sample was  
540 loaded onto 12% SDS-PAGE gels and transferred to nitrocellulose membranes.  
541 The membrane was blocked with TBST (10 mM Tris-Cl, 150 mM NaCl, and  
542 0.05% Tween 20, pH 8.0) containing 5% nonfat milk (TBSTM) at room  
543 temperature for 60 min and incubated with primary antibody in TBSTM  
544 (overnight at 4°C). Membranes were washed with TBST (three times for 5 min  
545 each) and then incubated with the appropriate horseradish  
546 peroxidase-conjugated secondary antibodies in TBSTM at room temperature  
547 for 1.5 h. After washing three times, bound antibodies were visualized with  
548 ECL substrate.

549

### 550 **Supplemental data**

551 **Supplemental Figure S1.** Phenotypes of *bHLH11-OX* plants.

552 **Supplemental Figure S2.** Genotypes of *bhlh11* mutants.

553 **Supplemental Figure S3.** Prediction of NLS in bHLH11.

554 **Supplemental Figure S4.** Phenotypes of *pER8-bHLH11* transgenic plants.

555 **Supplemental Figure S5.** Expression of *IRT1* and *FRO2* in *bHLH11dm-VP16*  
556 transgenic plants.

557 **Supplemental Figure S6.** Conserved EAR motif in the bHLH11 homologs  
558 from various plants species.

559 **Supplemental Table S1.** Primers used in this paper.

560

561

562

## 563 **ACKNOWLEDGEMENTS**

564 We thank the Biogeochemical Laboratory and Central Laboratory  
565 (Xishuangbanna Tropical Botanical Garden) for assistance in the  
566 determination of metal contents. This work was supported by the National  
567 Natural Science Foundation of China (31770270 to Gang Liang).

568

## 569 **AUTHOR CONTRIBUTIONS**

570 G.L. conceived the project. Y.L., R.L., M.P., C.L., Z. L., and G.L. constructed  
571 plasmids, M.P. and Y.C generated transgenic plants, and Y.L. and R.L.  
572 characterized plants, determined gene and protein expression and conducted  
573 cellular assays. Y.L. and G.L. wrote the manuscript and all authors discussed  
574 and approved the manuscript.

575

## 576 **REFERENCES**

- 577 Causier B, Ashworth M, Guo W, Davies B (2012) The TOPLESS interactome:  
578 A framework for gene repression in Arabidopsis. **Plant Physiol** 158:  
579 423-438
- 580 Cui Y, Chen CL, Cui M, Zhou WJ, Wu HL, Ling HQ (2018) Four IVa bHLH  
581 Transcription Factors Are Novel Interactors of FIT and Mediate JA Inhibition  
582 of Iron Uptake in Arabidopsis. **Mol Plant** 11: 1166-1183
- 583 Fernandez-Calvo P, Chini A, Fernandez-Barbero G, Chico JM, GimenezIbanez  
584 S, et al. (2011) The Arabidopsis bHLH Transcription Factors MYC3 and  
585 MYC4 Are Targets of JAZ Repressors and Act Additively with MYC2 in the  
586 Activation of Jasmonate Responses. **Plant Cell** 23: 701–715
- 587 Fourcroy P, Sisó-Terraza P, Sudre D, Sairón M, Reyt G, Gaymard F, Abadía A,  
588 Abadia J, Alvarez-Fernández A, Briat J (2014) Involvement of the ABCG37  
589 transporter in secretion of scopoletin and derivatives by Arabidopsis roots in  
590 response to iron deficiency. **New Phytol** 201: 155-167
- 591 Fourcroy P, Tissot N, Gaymard F, Briat JF, Dubos C (2016) Facilitated Fe  
592 Nutrition by Phenolic Compounds Excreted by the Arabidopsis  
593 ABCG37/PDR9 Transporter Requires the IRT1/FRO2 High-Affinity Root  
594 Fe(2+) Transport System. **Mol Plant** 9: 485-488
- 595 Gao F, Robe K, Bettembourg M, Navarro N, Rofidal V, Santoni V, Gaymard F,  
596 Vignols F, Roschztardt H, Izquierdo E, Dubos C (2020) The transcription  
597 factor bHLH121 interacts with bHLH105 (ILR3) and its closest homologs to  
598 regulate iron homeostasis in Arabidopsis. **Plant Cell** 32: 508-524

- 599 Gratz R, Manishankar P, Ivanov R, Köster P, Mohr I, Trofimov K, Steinhorst L,  
600 Meiser J, Mai HJ, Drerup M, Arendt S, Holtkamp M, Karst U, Kudla J, Bauer  
601 P, Brumbarova T (2019) CIPK11-dependent phosphorylation modulates fit  
602 activity to promote arabidopsis iron acquisition in response to calcium  
603 signaling. **Dev Cell** 48: 726-740
- 604 Tissot N, Robe K, Gao F, Grant-Grant S, Boucherez J, Bellegarde F,  
605 Maghiaoui A, Marcelin R (2019) Transcriptional integration of the responses  
606 to iron availability in Arabidopsis by the bHLH factor ILR3. **New Phytol**  
607 223:1433-1446
- 608 Tsai HH, Rodríguez-Celma J, Lan P, Wu YC, Vélez-Bermúdez IC, Schmidt W.  
609 (2018) Scopoletin 8-Hydroxylase-Mediated Fraxetin Production Is Crucial for  
610 Iron Mobilization. **Plant Physiol** 177:194-207
- 611 Henriques R, Jásik J, Klein M, Martinoia E, Feller U, Schell J, Pais MS, Koncz  
612 C (2002) Knock-out of Arabidopsis metal transporter gene IRT1 results in  
613 iron deficiency accompanied by cell differentiation defects. **Plant Mol Biol**  
614 50: 587–597
- 615 Jeong J, Guerinot ML. (2009) Homing in on iron homeostasis in plants. Trends  
616 **Plant Sci** 14: 280-285
- 617 Kagale S, Links MG, Rozwadowski K (2010) Genome-wide analysis of  
618 Ethylene responsive element binding factor-associated Amphiphilic  
619 Repression motif-containing transcriptional regulators in Arabidopsis. **Plant**  
620 **Physiol** 152: 1109-1134
- 621 Kim SA, LaCroix IS, Gerber SA, Guerinot ML. (2019) The iron deficiency  
622 response in Arabidopsis thaliana requires the phosphorylated transcription  
623 factor URI. **Proc Natl Acad Sci USA** 116: 24933-24942
- 624 Kosugi S, Hasebe M, Tomita M, Yanagawa H (2009) Systematic identification  
625 of yeast cell cycle-dependent nucleocytoplasmic shuttling proteins by  
626 prediction of composite motifs. **Proc Natl Acad Sci USA** 106: 10171-10176
- 627 Krogan NT, Long JA (2009) Why so repressed? Turning off transcription during  
628 plant growth and development. **Curr Opin Plant Biol** 12: 628-636
- 629 Kobayashi T, Nishizawa NK (2012) Iron uptake, translocation, and regulation in  
630 higher plants. **Annu Rev Plant Biol** 63: 131–152
- 631 Kobayashi T, Ozu A, Kobayashi S, An G, Jeon JS, Nishizawa NK (2019)  
632 OsbHLH058 and OsbHLH059 transcription factors positively regulate iron  
633 deficiency responses in rice. **Plant Mol Biol** 101: 471-486
- 634 Lei R, Li Y, Cai Y, Li C, Pu M, Lu C, Yang Y, Liang G (2020) bHLH121  
635 Functions as a Direct Link that Facilitates the Activation of FIT by bHLH IVc  
636 Transcription Factors for Maintaining Fe Homeostasis in Arabidopsis. **Mol**  
637 **Plant** doi: 10.1016/j.molp.2020.01.006
- 638 Li C, Liu X, Qiang X, Li X, Li X, Zhu S, Wang L, Wang Y, Liao H, Luan S, Yu F  
639 (2018) EBP1 nuclear accumulation negatively feeds back on  
640 FERONIA-mediated RALF1 signaling. **PLoS Biol** 16(10):e2006340
- 641 Li X, Zhang H, Ai Q, Liang G, Yu D (2016) Two bHLH transcription factors,  
642 bHLH34 and bHLH104, regulate iron homeostasis in *Arabidopsis thaliana*.

- 643 **Plant Physiol** 170: 2478-2493
- 644 Liang G, Zhang HM, Lou DJ, Yu DQ (2016) Selection of highly efficient  
645 sgRNAs for CRISPR/Cas9-based plant genome editing. **Sci Rep** 6: 21451
- 646 Liang G, Zhang HM, Li XL, Ai Q, Yu D (2017) bHLH transcription factor  
647 bHLH115 regulates iron homeostasis in *Arabidopsis thaliana*. **J Exp Bot** 68:  
648 1743-1755
- 649 Liang G, Zhang H, Li Y, Pu M, Yang Y, Li C, Lu C, Xu P, Yu D (2020) *Oryza*  
650 *sativa* Fer-like fe deficiency-induced transcription factor (OsFIT/OsbHLH156)  
651 interacts with OsIRO2 to regulate iron homeostasis. **J Integr Plant Biol** doi:  
652 10.1111/jipb.12933.
- 653 Liu L, Zhang Y, Tang S, Zhao Q, Zhang Z, Zhang H, Dong L, Guo H, Xie Q  
654 (2010) An efficient system to detect protein ubiquitination by agroinfiltration in  
655 *Nicotiana benthamiana*. **Plant J** 61: 893-903
- 656 Liu TY, Chou WC, Chen WY, Chu CY, Dai CY, Wu PY (2018) Detection of  
657 membrane protein-protein interaction in planta based on dual-intein-coupled  
658 tripartite split-GFP association. **Plant J** 94: 426-438
- 659 Long TA, Tsukagoshi H, Busch W, Lahner B, Salt DE, Benfey PN (2010) The  
660 bHLH transcription factor POPEYE regulates response to iron deficiency in  
661 *Arabidopsis* roots. **Plant Cell** 22: 2219-2236.
- 662 Ogo Y, Itai RN, Nakanishi H, Kobayashi T, Takahashi M, Mori S, Nishizawa NK  
663 (2007) The rice bHLH protein OsIRO2 is an essential regulator of the genes  
664 involved in Fe uptake under Fe-deficient conditions. **Plant J** 51: 366-377
- 665 Pauwels L, Barbero GF, Geerinck J, Tilleman S, Grunewald W, Pérez AC,  
666 Chico JM, Bossche RV, Sewell J, Gil E, García-Casado G, Witters E, Inzé D,  
667 Long JA, De Jaeger G, Solano R, Goossens A. (2010) NINJA connects the  
668 co-repressor TOPLESS to jasmonate signalling. **Nature** 464:788-791
- 669 Quinet M, Vromman D, Clippe A, Bertin P, Lequeux H, Dufey I, Lutts S, Lefèvre  
670 I (2012) Combined transcriptomic and physiological approaches reveal  
671 strong differences between short- and long-term response of rice (*Oryza*  
672 *sativa*) to iron toxicity. **Plant Cell Environ** 35:1837–1859
- 673 Robinson NJ, Procter CM, Connolly EL, Guerinot ML (1999) A ferricchelate  
674 reductase for iron uptake from soils. **Nature** 397: 694–697
- 675 Rodríguez-Celma J, Lin W-D, Fu G-M, Abadía J, López-Millán, Schmidt W  
676 (2013) Mutually exclusive alterations in secondary metabolism are critical for  
677 the uptake of insoluble iron compounds by *Arabidopsis* and *Medicago*  
678 *truncatula*. **Plant Physiol** 162: 1473-1485
- 679 Samira R, Li B, Kliebenstein D, Li C, Davis E, Gillikin JW, Long TA. (2018). The  
680 bHLH transcription factor ILR3 modulates multiple stress responses in  
681 *Arabidopsis*. **Plant Mol Biol** 97: 297-309
- 682 Santi S, Schmidt W (2009) Dissecting iron deficiency-induced proton extrusion  
683 in *Arabidopsis* roots. **New Phytol** 183: 1072–1084
- 684 Selote D, Samira R, Matthiadis A, Gillikin JW, Long TA (2015) Iron-binding E3  
685 ligase mediates iron response in plants by targeting basic helix-loop-helix  
686 transcription factors. **Plant Physiol** 167: 273-286



- 687 Schmid NB, Giehl RF, Döll S, Mock HP, Strehmel N, Scheel D, Kong X, Hider  
688 RC, von Wirén (2014) Feruloyl-CoA 69-Hydroxylase1-dependent coumarins  
689 mediate iron acquisition from alkaline substrates in Arabidopsis. **Plant**  
690 **Physiol** 164: 160-172
- 691 Shahbazian MD, Grunstein M (2007) Functions of site-specific histone  
692 acetylation and deacetylation. **Annu Rev Biochem** 76:75-100
- 693 Siwinska J, Siatkowska K, Olry A, Grosjean J, Hehn A, Bourgaud F, Meharg  
694 AA, Carey M, Lojkowska E, Ichnatowicz A (2018) Scopoletin 8-hydroxylase: a  
695 novel enzyme involved in coumarin biosynthesis and iron-deficiency  
696 responses in Arabidopsis. **J Exp Bot** 69:1735-1748
- 697 Song S, Qi T, Fan M, Zhang X, Gao H, Huang H, Wu D, Guo H, Xie D (2013)  
698 The bHLH subgroup IIIId factors negatively regulate jasmonate-mediated  
699 plant defense and development. **PLoS Genet** 9(7):e1003653
- 700 Szemenyei H, Hannon M, Long JA (2008) TOPLESS mediates auxin dependent  
701 transcriptional repression during Arabidopsis embryogenesis. **Science** 319:  
702 1384-1388
- 703 Tanabe N, Noshi M, Mori D, Nozawa K, Tamoi M, Shigeoka S. (2019) The  
704 basic helix-loop-helix transcription factor, bHLH11 functions in the  
705 iron-uptake system in Arabidopsis thaliana. **J Plant Res** 132: 93-105
- 706 Tissot N, Robe K, Gao F, Grant-Grant S, Boucherez J, Bellegarde F,  
707 Maghiaoui A, Marcelin R, Izquierdo E, Benhamed M, Martin A, Vignols F1,  
708 Roschttardt H, Gaymard F, Briat JF, Dubos C (2019) Transcriptional  
709 integration of the responses to iron availability in Arabidopsis by the bHLH  
710 factor ILR3. **New Phytol** 223:1433-1446
- 711 Trofimov K, Ivanov R, Eutebach M, Acaroglu B, Mohr I, Bauer P, Brumbarova T.  
712 (2019) Mobility and localization of the iron deficiency-induced transcription  
713 factor bHLH039 change in the presence of FIT. **Plant Direct** 3(12):e00190
- 714 Wang HY, Klatt M, Jakoby M, Bäumlein H, Weisshaar B, Bauer P (2007) Iron  
715 deficiency-mediated stress regulation of four subgroup Ib BHLH genes in  
716 Arabidopsis thaliana. **Planta** 226: 897-908
- 717 Wang N, Cui Y, Liu Y, Fan H, Du J, Huang Z, Yuan Y, Wu H, Ling HQ (2013)  
718 Requirement and functional redundancy of Ib subgroup bHLH proteins for  
719 iron deficiency responses and uptake in Arabidopsis thaliana. **Mol Plant** 6:  
720 503-513
- 721 Wang S, Li L, Ying Y, Wang J, Shao JF, Yamaji N, Whelan J, Ma JF, Shou H  
722 (2020) A transcription factor OsbHLH156 regulates Strategy II iron acquisition  
723 through localising IRO2 to the nucleus in rice. **New Phytol** 225:1247-1260
- 724 Wu FH, Shen SC, Lee LY, Lee SH, Chan MT, Lin CS (2009) Tape-Arabidopsis  
725 Sandwich - a simpler Arabidopsis protoplast isolation method. **Plant**  
726 **Methods** 5:16
- 727 Yuan Y, Wu H, Wang N, Li J, Zhao W, Du J, Wang D, Ling HQ (2008) FIT  
728 interacts with AtbHLH38 and AtbHLH39 in regulating iron uptake gene  
729 expression for iron homeostasis in Arabidopsis. **Cell Res** 18: 385-397
- 730 Zhang H, Li Y, Yao X, Liang G, Yu D (2017) POSITIVE REGULATOR OF IRON

731 HOMEOSTASIS1, OsPRI1, facilitates iron homeostasis. **Plant Physiol** 175:  
732 543-554  
733 Zhang J, Liu B, Li M, Feng D, Jin H, Wang P, Liu J, Xiong F, Wang J, Wang HB  
734 (2015) The bHLH Transcription Factor bHLH104 Interacts with  
735 IAA-LEUCINE RESISTANT3 and Modulates Iron Homeostasis in  
736 Arabidopsis. **Plant Cell** 27: 787-805  
737 Zheng L, Ying Y, Wang L, Wang F, Whelan J, Shou H (2010) Identification of a  
738 novel iron regulated basic helix-loop-helix protein involved in Fe  
739 homeostasis in *Oryza sativa*. **BMC Plant Biol** 10:166  
740 Zuo J, Niu QW, Chua NH (2001) Technical advance: An estrogen  
741 receptor-based transactivator XVE mediates highly inducible gene  
742 expression in transgenic plants. **Plant J** 24: 265-273  
743  
744



Iron responsive genes in WT, *bHLH11*-OX plants and *bhlh11* mutants.

| Fe100                   |                        |                         | Fe0                     |                          |                          |                          |                         |
|-------------------------|------------------------|-------------------------|-------------------------|--------------------------|--------------------------|--------------------------|-------------------------|
| 7-24                    | <i>bhlh11-1</i>        | <i>bhlh11-2</i>         | WT                      | <i>OX-20</i>             | <i>OX-24</i>             | <i>bhlh11-1</i>          | <i>bhlh11-2</i>         |
| 19±0.02 <sup>b</sup>    | 1.82±0.22 <sup>c</sup> | 1.65±0.17 <sup>c</sup>  | 59.72±2.61 <sup>A</sup> | 0.33±0.07 <sup>A</sup>   | 0.38±0.04 <sup>A</sup>   | 75.09±2.64 <sup>C</sup>  | 70.21±1.30 <sup>C</sup> |
| 12±0.04 <sup>b</sup>    | 1.29±0.05 <sup>c</sup> | 1.51±0.15 <sup>c</sup>  | 69.28±1.80 <sup>C</sup> | 0.49±0.04 <sup>A</sup>   | 0.52±0.05 <sup>A</sup>   | 98.37±3.64 <sup>C</sup>  | 97.06±8.66 <sup>C</sup> |
| 17±0.25 <sup>c</sup>    | 3.48±0.23 <sup>b</sup> | 3.62±0.13 <sup>b</sup>  | 80.79±2.32 <sup>A</sup> | 106.52±4.12 <sup>B</sup> | 94.5±4.63 <sup>B</sup>   | 96.04±1.82 <sup>B</sup>  | 97.28±3.71 <sup>B</sup> |
| 13±0.57 <sup>c</sup>    | 2.62±0.57 <sup>b</sup> | 3.00±0.14 <sup>b</sup>  | 43.06±3.33 <sup>A</sup> | 61.67±2.36 <sup>B</sup>  | 61.28±0.82 <sup>B</sup>  | 64.08±2.56 <sup>B</sup>  | 62.48±4.31 <sup>B</sup> |
| 19±0.92 <sup>c</sup>    | 2.04±0.15 <sup>b</sup> | 2.31±0.24 <sup>b</sup>  | 72.87±2.72 <sup>A</sup> | 105.75±3.00 <sup>B</sup> | 101.34±0.89 <sup>B</sup> | 102.64±2.38 <sup>B</sup> | 97.54±2.48 <sup>B</sup> |
| 17±0.49 <sup>b</sup>    | 1.33±0.23 <sup>a</sup> | 1.35±0.25 <sup>a</sup>  | 41.01±1.94 <sup>A</sup> | 58.65±3.83 <sup>B</sup>  | 68.15±1.67 <sup>C</sup>  | 65.09±4.20 <sup>BC</sup> | 67.5±2.98 <sup>C</sup>  |
| 7±0.20 <sup>a</sup>     | 1.05±0.08 <sup>a</sup> | 1.04±0.05 <sup>a</sup>  | 3.12±0.12 <sup>A</sup>  | 3.21±0.11 <sup>A</sup>   | 3.10±0.14 <sup>A</sup>   | 3.07±0.24 <sup>A</sup>   | 3.00±0.11 <sup>A</sup>  |
| 15±0.24 <sup>c</sup>    | 2.64±0.49 <sup>b</sup> | 3.48±0.63 <sup>bc</sup> | 5.29±0.30 <sup>A</sup>  | 7.00±0.13 <sup>BC</sup>  | 7.82±0.41 <sup>C</sup>   | 6.21±0.10 <sup>B</sup>   | 6.59±0.63 <sup>B</sup>  |
| 10±0.19 <sup>c</sup>    | 1.53±0.22 <sup>b</sup> | 1.30±0.23 <sup>ab</sup> | 3.34±0.28 <sup>A</sup>  | 4.18±0.15 <sup>B</sup>   | 4.56±0.46 <sup>B</sup>   | 4.55±0.43 <sup>B</sup>   | 5.04±0.25 <sup>B</sup>  |
| 15±0.30 <sup>b</sup>    | 1.52±0.19 <sup>b</sup> | 1.47±0.22 <sup>b</sup>  | 5.65±1.00 <sup>C</sup>  | 61.03±6.82 <sup>D</sup>  | 69.3±5.64 <sup>D</sup>   | 8.43±0.55 <sup>C</sup>   | 9.5±1.46 <sup>C</sup>   |
| 19±0.16 <sup>a</sup>    | 1.05±0.07 <sup>a</sup> | 1.22±0.17 <sup>a</sup>  | 1.97±0.18 <sup>A</sup>  | 2.12±0.20 <sup>A</sup>   | 2.02±0.12 <sup>A</sup>   | 2.20±0.21 <sup>A</sup>   | 2.17±0.29 <sup>A</sup>  |
| 10±0.41 <sup>a</sup>    | 1.16±0.26 <sup>a</sup> | 1.29±0.37 <sup>a</sup>  | 5.41±0.57 <sup>AB</sup> | 5.80±1.32 <sup>B</sup>   | 6.00±1.75 <sup>B</sup>   | 4.96±0.29 <sup>A</sup>   | 6.26±0.71 <sup>B</sup>  |
| 5±0.25 <sup>a</sup>     | 0.95±0.18 <sup>a</sup> | 0.99±0.29 <sup>a</sup>  | 2.91±0.14 <sup>A</sup>  | 4.01±0.40 <sup>B</sup>   | 3.23±0.28 <sup>B</sup>   | 3.89±0.21 <sup>B</sup>   | 3.85±0.27 <sup>B</sup>  |
| 3.06±10.71 <sup>c</sup> | 1.07±0.06 <sup>a</sup> | 1.10±0.09 <sup>b</sup>  | 0.52±0.04 <sup>B</sup>  | 111.79±8.64 <sup>C</sup> | 125.71±7.98 <sup>C</sup> | 0.49±0.02 <sup>A</sup>   | 0.54±0.07 <sup>A</sup>  |

Fe0 media for 7d. RNA was prepared from root tissues. The expression of *ACT2* was used to normalize mRNA levels, and the gene Fe100 was set to 1<sup>a</sup>. Different letters above each bar indicate statistically significant differences as determined by one-way ANOVA comparison test (P < 0.05) and .

## Figure Legends

### Figure 1. *bhlh11* loss-of-function mutants are sensitive to excessive Fe.

(A) Phenotypes of *bhlh11* mutants. Two-week-old seedlings grown on Fe0, Fe100 or Fe300 media.

(B) Shoot biomass of *bhlh11* mutants. Fresh weight of two-week-old shoots grown on Fe0, Fe100 or Fe300 media. Student' t test indicated that the values marked by an asterisk are significantly different from the corresponding wild-type value ( $P < 0.05$ ).

(C) Fe concentration of rosette leaves of 3-week-old WT and *bhlh11* plants grown in soil. Student' t test indicated that the values marked by an asterisk are significantly different from the corresponding wild-type value ( $P < 0.05$ ).

### Figure 2. Response of bHLH11 to Fe status

(A) RT-qPCR analysis of *bHLH11* expression. Four-day-old plants grown on Fe100 media were shifted to Fe0, Fe50, Fe100, and F300 media for 3 days. Roots were used for RNA extraction and RT-qPCR. The different letters above each bar indicate statistically significant differences as determined by one-way ANOVA followed by Tukey's multiple comparison test ( $P < 0.05$ ).

(B) Degradation of bHLH11 in response to Fe deficiency. Seven-day-old WT and *bHLH11-OX-20* seedlings grown on Fe100 media were transferred to Fe0 or Fe300 media, and root samples were harvested after 1, 2, and 3 days. anti-HA was used to detect HA-bHLH11.  $\beta$ -tubulin was detected by anti- $\beta$ -tubulin and used as a loading control.

(C) Subcellular localization of bHLH11. The free mCherry, bHLH11-mCherry or bHLH11-NLS-mCherry were transiently expressed in tobacco leaves.

### Figure 3. bHLH11 physically interacts with bHLH IVc TFs.

(A) Yeast two-hybrid analysis of the interaction between bHLH11 and bHLH IVc TFs. Yeast cotransformed with different BD and AD plasmid combinations

was spotted on synthetic dropout medium lacking Leu/Trp (SD–W/L) or Trp/Leu/His/Ade (SD –W/L/H/A).

(B) Interaction of bHLH11 and bHLH IVc TFs in plant cells. Tripartite split-sfGFP complementation assays were performed. bHLH34, bHLH104, bHLH105, and bHLH115 were fused with GFP10, and bHLH11 was fused with GFP11. The combinations indicated were introduced into *Agrobacterium* and co-expressed in *Nicotiana benthamiana* leaves..

(C) Co-IP analysis of the interaction between bHLH11 and bHLH IVc TFs. Total proteins from different combinations of HA-bHLH11 and MYC-GFP, MYC-bHLH34, MYC-bHLH104, MYC-bHLH105, or MYC-bHLH115 were immunoprecipitated with anti-MYC followed by immunoblotting with the indicated antibodies. MYC-GFP was used as the negative control. Protein molecular weight (in kD) is indicated to the left of the immunoblot.

**Figure 4** Change of bHLH11 subcellular localization.

(A) Location of bHLH11 in the absence or presence of bHLH IVc. bHLH11-mCherry was co-expressed with bHLH IVc TFs. The combination of bHLH11-GFP and free mCherry was used as a negative control. Transient expression assays were performed in tobacco leaves.

(B) Immunoblot analysis of bHLH11 protein distributions in the cytoplasm and nuclear fractions. Seven-day-old *bHLH11-OX-20* seedlings grown on Fe100 media were transferred to Fe0 or Fe300 media. Root samples were harvested after 3 days, and cytoplasmic and nuclear proteins were extracted and subjected to immunoblot analysis with the indicated antibodies.

**Figure 5.** bHLH11 antagonizes the transcriptional activation ability of bHLH IVc TFs.

(A) bHLH11 represses the functions of bHLH IVc TFs. Schematic diagram of the constructs transiently expressed in *Arabidopsis* protoplasts. The LUC/REN ratio represents the LUC activity relative to the internal control (REN driven by

the 35S promoter). The asterisk indicates a significant difference as determined by Students' t test.

(B) bHLH11 inhibits the functions of bHLH IVc TFs by direct protein–protein interaction. The schematic diagram shows the constructs used in the transient expression assays in tobacco leaves. The abundance of *GFP* was normalized to that of *NPTII*. The asterisk indicates a significant difference as determined by Students' t test.

(C) Expression of bHLH Ib genes in *pER8-bHLH11* plants. Seven-day-old plants grown on Fe0 media were transferred to Fe0 media with or without 4  $\mu$ M estradiol for 6 h, and root samples were harvested and used for RNA extraction and RT-qPCR. The different letters above each bar indicate statistically significant differences as determined by one-way ANOVA followed by Tukey's multiple comparison test ( $P < 0.05$ ).

**Figure 6.** bHLH11 acts as a repressor by recruiting TPL/TPR corepressors.

(A) Schematic diagram of the various mutated versions of bHLH11. The mutated amino acid is indicated in red. bHLH11m1, the first EAR mutated. bHLH11m2, the second EAR mutated. bHLH11dm, both double EARs mutated. bHLH11dm-VP16, bHLH11dm fused with the VP16 domain.

(B) The EAR motifs are required for the interaction between bHLH11 and TPL/TPR. Yeast cotransformed with different BD and AD plasmid combinations was spotted on synthetic dropout medium lacking Leu/Trp (SD –T/L) or Trp/Leu/His/Ade (SD –T/L/H/A).

(C) The schematic diagram shows the constructs used in the transient expression assays in (D).

(D) The EAR motifs are required for the repression of bHLH11. Arabidopsis protoplasts were used for transient expression assays.

(E) Phenotypes of *bHLH11dm-VP16* and *bHLH11-OX* plants. Seven-day-old seedlings grown on Fe0 or Fe100 media are shown.

**Figure 7.** A working model of bHLH11 in Fe homeostasis.

bHLH11 functions as an active repressor by recruiting TPL/TPR corepressors. Under Fe-sufficient conditions, *bHLH11* message is activated and its protein accumulates. bHLH11 inhibits the transactivity of bHLH IVc TFs to bHLH Ib genes. bHLH11 may directly regulate the expression of Fe deficiency-responsive gene *IRT1* and *FRO2* (as indicated by a question sign). The repressor function of bHLH11 allows plants to avoid Fe toxicity. Under Fe-deficient conditions, unknown proteins repress the transcription of *bHLH11*, which alleviates the bHLH11-mediated repression to bHLH IVc TFs. bHLH IVc TFs promotes the transcription of bHLH Ib genes. bHLH Ib TFs and FIT activate the expression of the Fe uptake-associated gene *IRT1* and *FRO2*. The question signs indicate unknown proteins.

**A**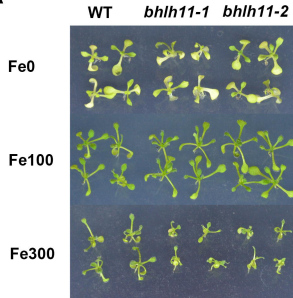**B**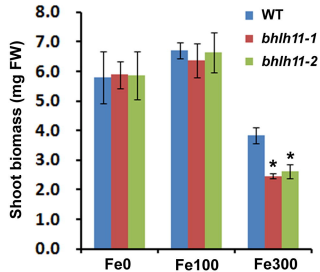**C**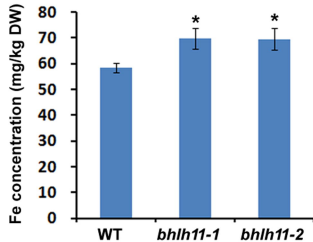

**A**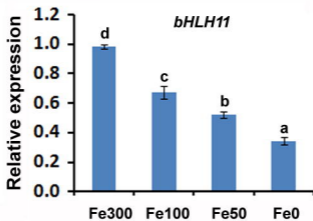**B**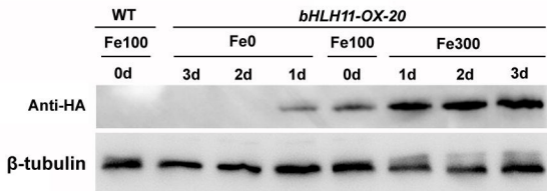**C**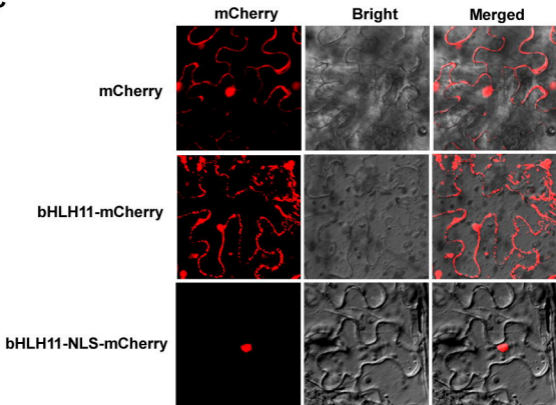

**A**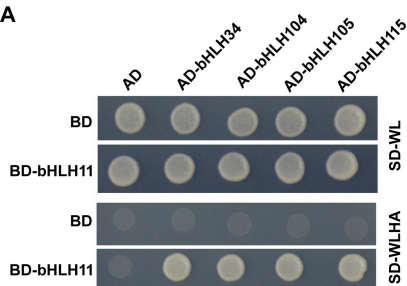**C**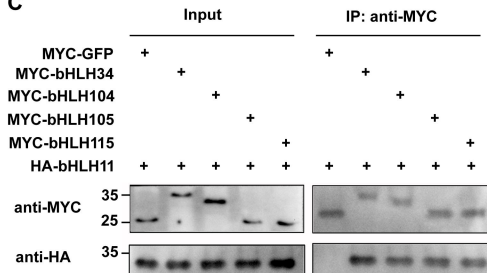**B**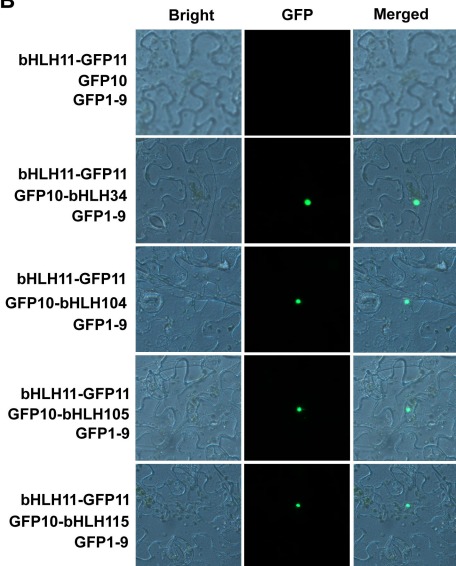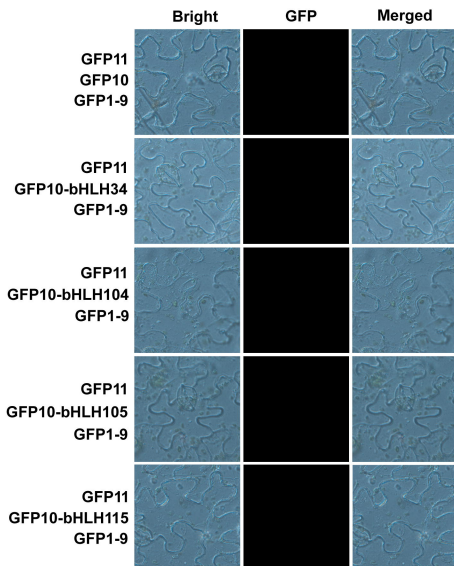



**A**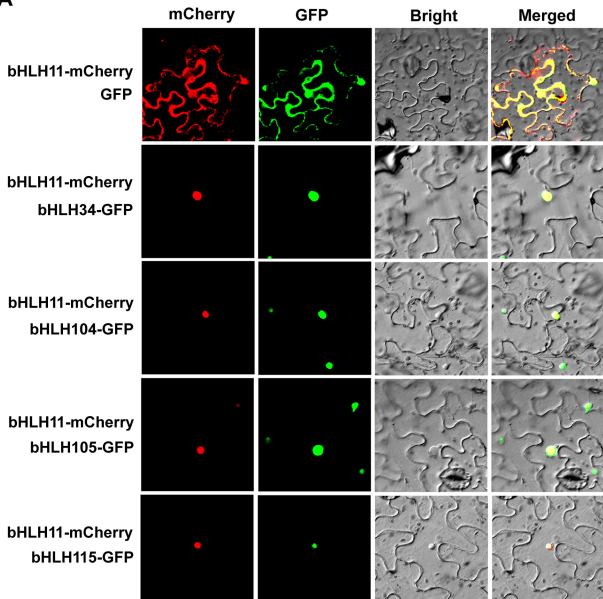**B**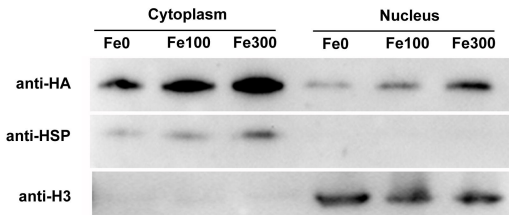

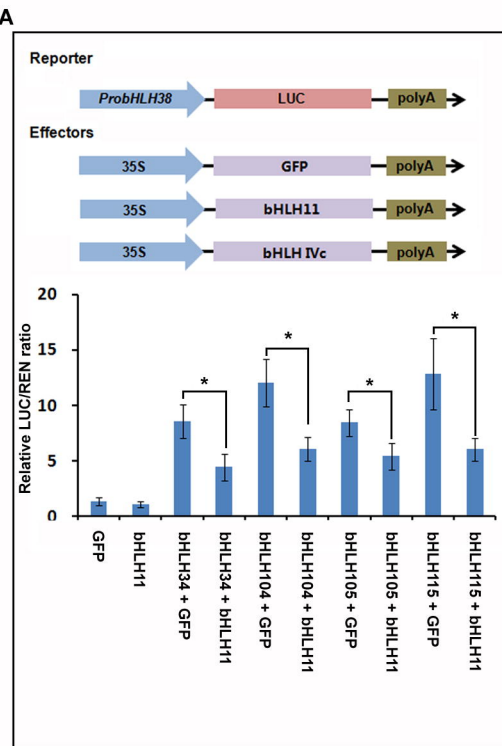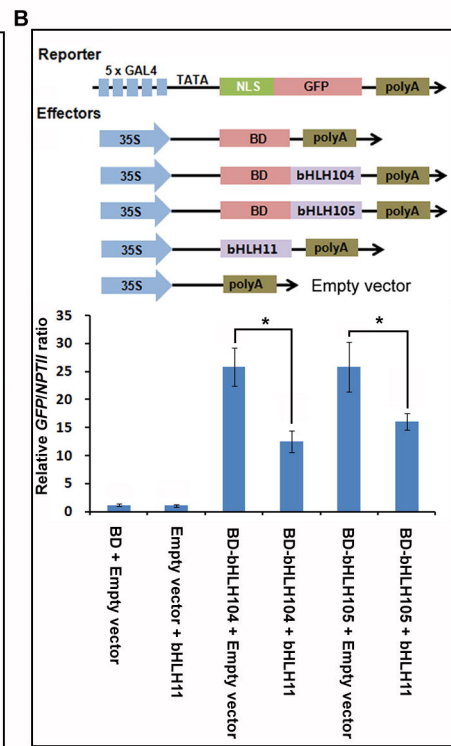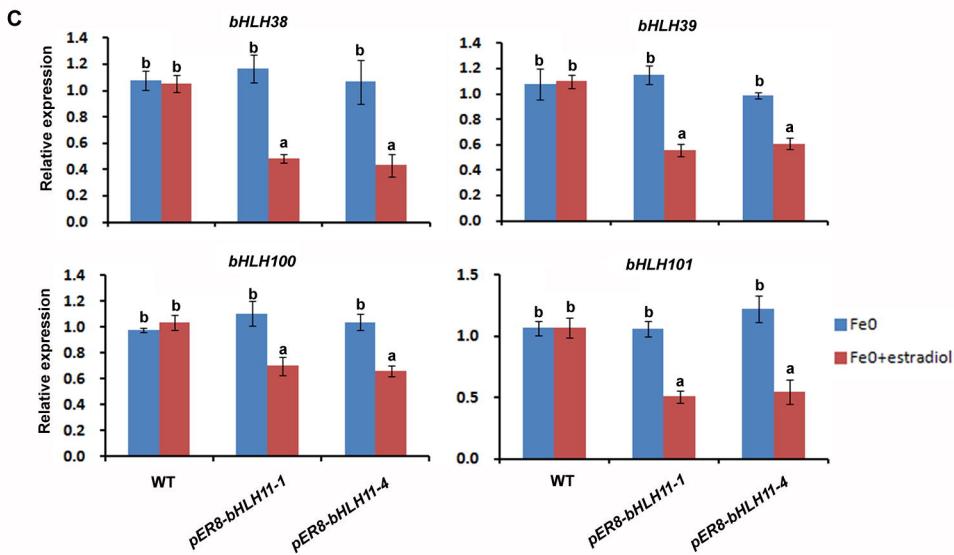

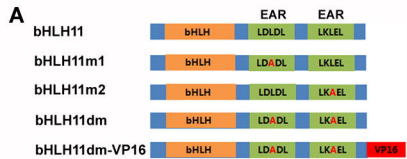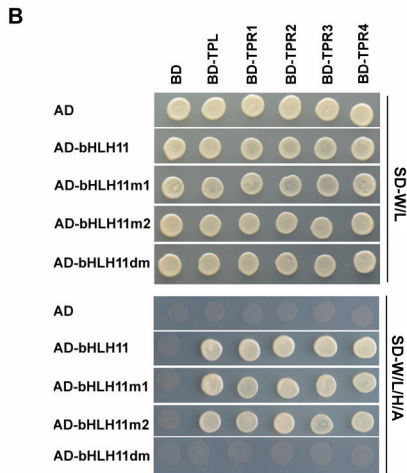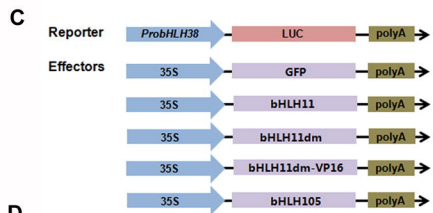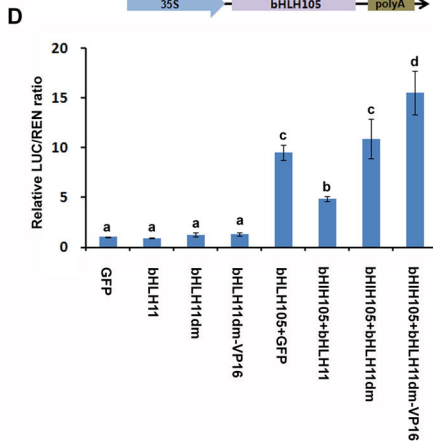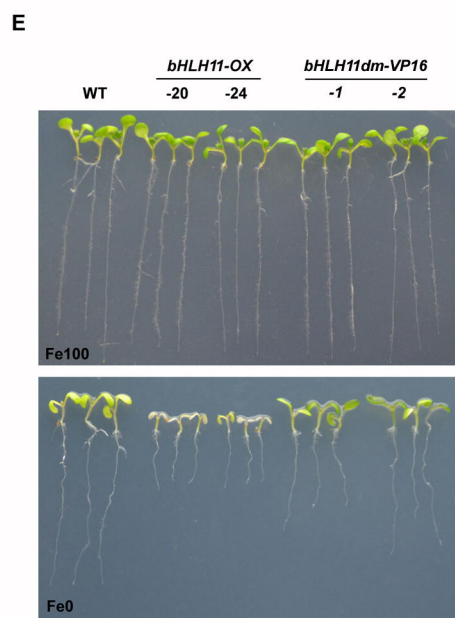

+Fe

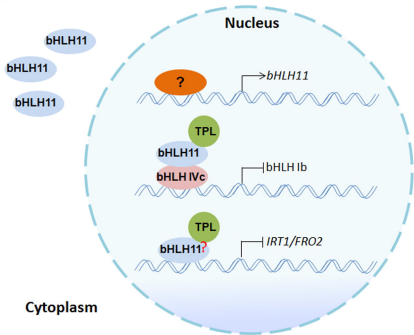

-Fe

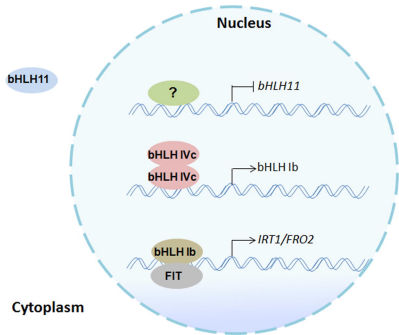

Source: https://www.biorxiv.org/content/biorxiv/early/2020/04/10/2020.04.09.035097.full.pdf
